# Supplementary material for: Mexicanolide-Type Limonoids from the Roots of Trichilia sinensis
Source: MDPI journal article supplement (doi:10.3390/molecules21091152), 2016-08-30
Supplement: s1 [file s1]

## Supplementary Materials: Mexicanolide-Type Limonoids from the Roots of *Trichilia sinensis*

Shou-Bai Liu, Wen-Li Mei, Hui-Qin Chen, Zhi-Kai Guo, Hao-Fu Dai and Zhu-Nian Wang

### Contents

- Figure S1. <sup>1</sup>H-NMR (500 MHz, CDCl<sub>3</sub>) spectrum of compound 1
- Figure S2. <sup>13</sup>C-NMR (125 MHz, CDCl<sub>3</sub>) spectrum of compound 1
- Figure S3. HSQC spectrum of compound 1 in CDCl<sub>3</sub>
- Figure S4. <sup>1</sup>H-<sup>1</sup>H COSY spectrum of compound 1 in CDCl<sub>3</sub>
- Figure S5. HMBC spectrum of compound 1 in CDCl<sub>3</sub>
- Figure S6. ROESY spectrum of compound 1 in CDCl<sub>3</sub>
- Figure S7. HREI-MS spectrum of compound 1
- Figure S8. <sup>1</sup>H-NMR (500 MHz, CDCl<sub>3</sub>) spectrum of compound 2
- Figure S9. <sup>13</sup>C-NMR (125 MHz, CDCl<sub>3</sub>) spectrum of compound 2
- Figure S10. HSQC spectrum of compound 2 in CDCl<sub>3</sub>
- Figure S11. <sup>1</sup>H-<sup>1</sup>H COSY spectrum of compound 2 in CDCl<sub>3</sub>
- Figure S12. HMBC spectrum of compound 2 in CDCl<sub>3</sub>
- Figure S13. ROESY spectrum of compound 2 in CDCl<sub>3</sub>
- Figure S14. HRESI-MS spectrum of compound 2
- Figure S15. <sup>1</sup>H-NMR (500 MHz, CDCl<sub>3</sub>) spectrum of compound 3
- Figure S16. <sup>13</sup>C-NMR (125 MHz, CDCl<sub>3</sub>) spectrum of compound 3
- Figure S17. HSQC spectrum of compound 3 in CDCl<sub>3</sub>
- Figure S18. <sup>1</sup>H-<sup>1</sup>H COSY spectrum of compound 3 in CDCl<sub>3</sub>
- Figure S19. HMBC spectrum of compound 3 in CDCl<sub>3</sub>
- Figure S20. ROESY spectrum of compound 3 in CDCl<sub>3</sub>
- Figure S21. HRESI-MS spectrum of compound 3
- Figure S22. <sup>1</sup>H-NMR (500 MHz, CDCl<sub>3</sub>) spectrum of compound 4
- Figure S23. <sup>13</sup>C-NMR (125 MHz, CDCl<sub>3</sub>) spectrum of compound 4
- Figure S24. HSQC spectrum of compound 4 in CDCl<sub>3</sub>
- Figure S25. <sup>1</sup>H-<sup>1</sup>H COSY spectrum of compound 4 in CDCl<sub>3</sub>
- Figure S26. HMBC spectrum of compound 4 in CDCl<sub>3</sub>
- Figure S27. ROESY spectrum of compound 4 in CDCl<sub>3</sub>
- Figure S28. HRESI-MS spectrum of compound 4

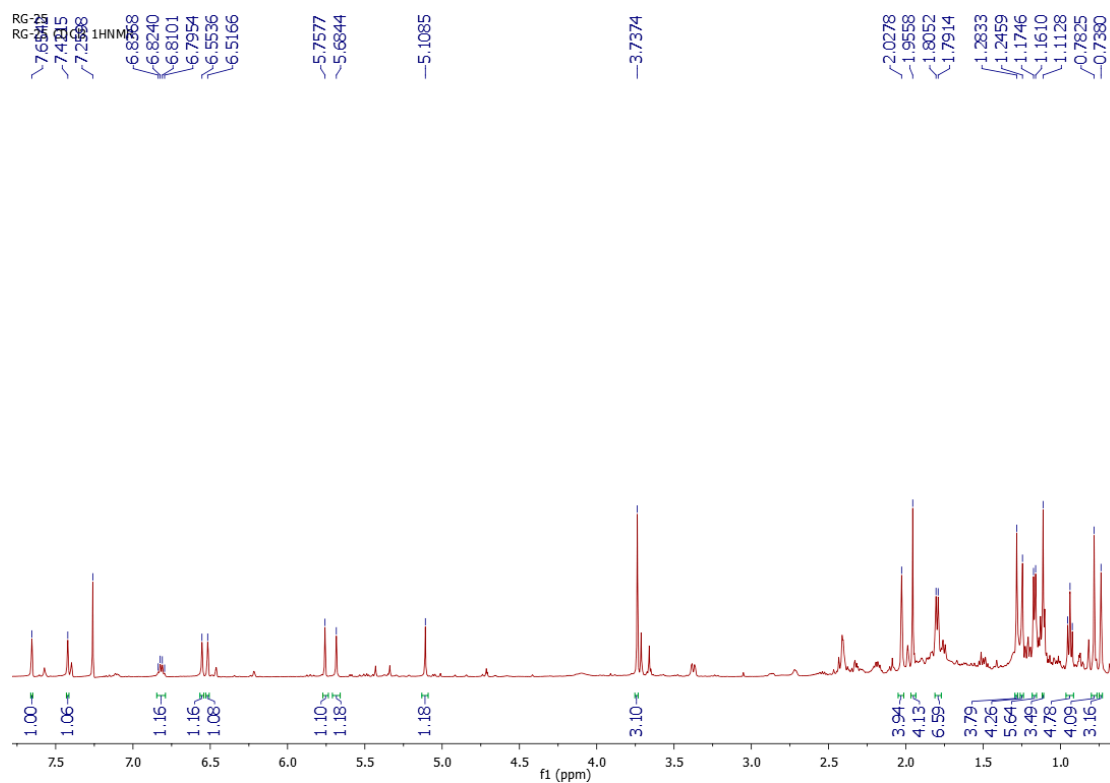Figure S1.  $^1\text{H}$ -NMR (500 MHz,  $\text{CDCl}_3$ ) spectrum of compound **1**.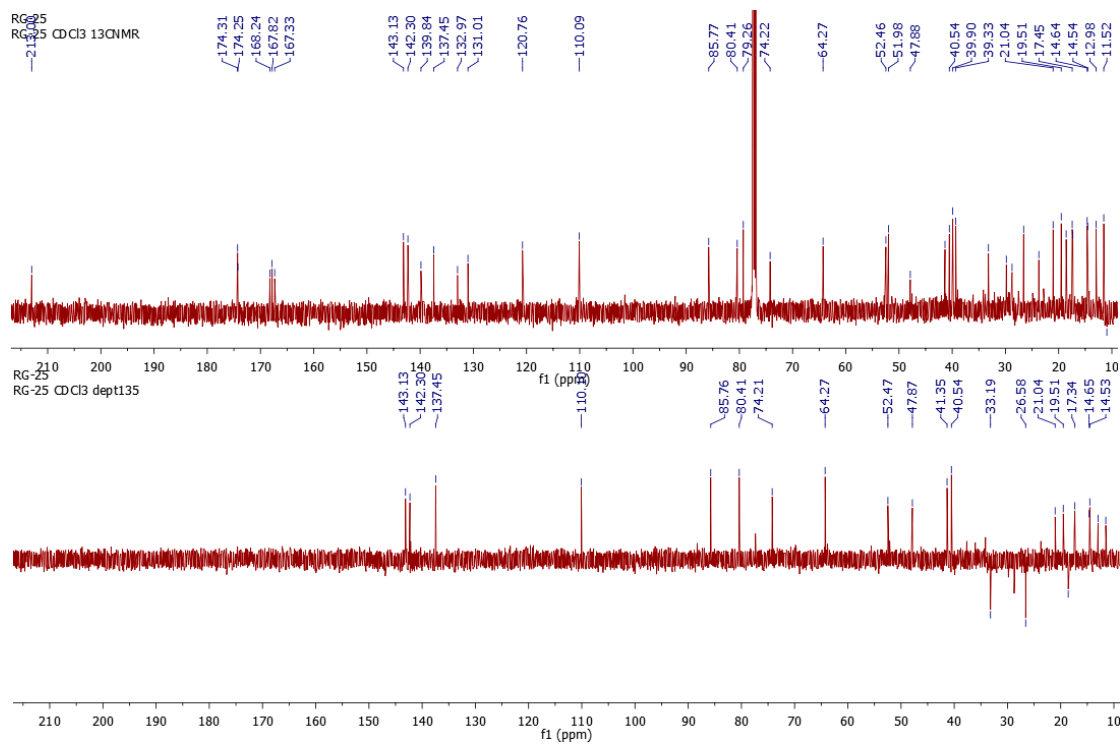Figure S2.  $^{13}\text{C}$ -NMR (125 MHz,  $\text{CDCl}_3$ ) spectrum of compound **1**.

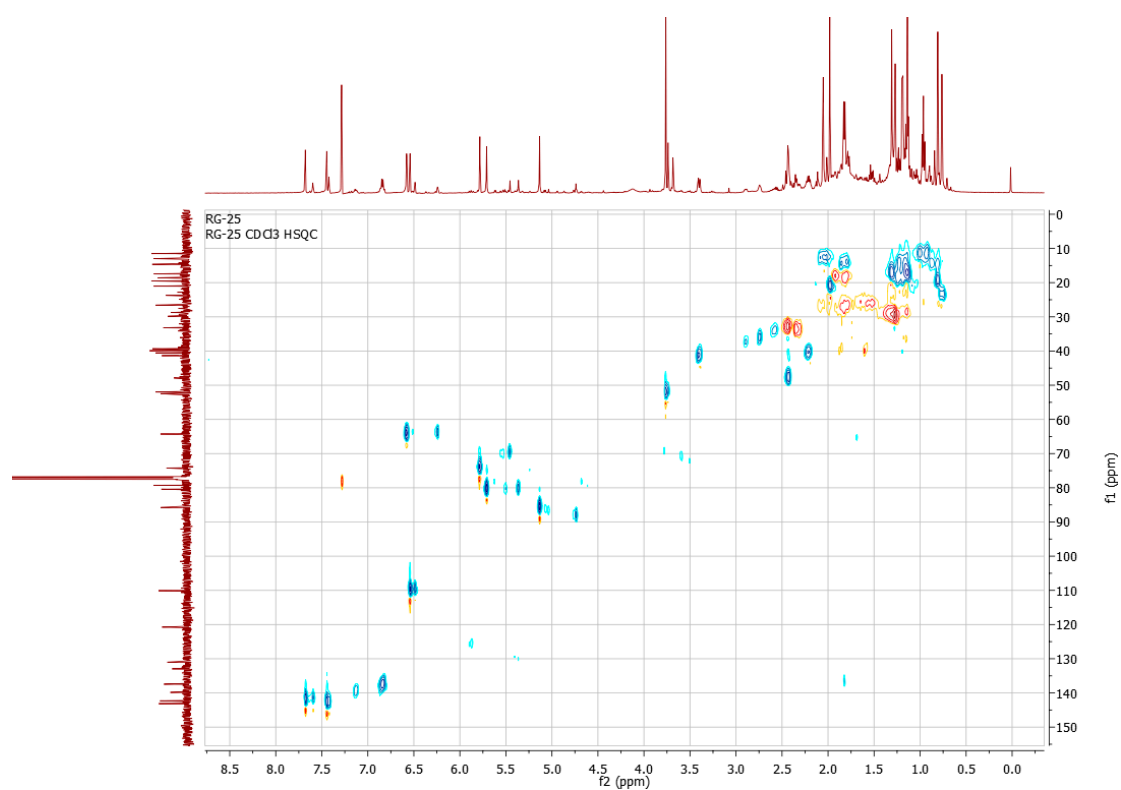

**Figure S3.** HSQC spectrum of compound **1** in CDCl<sub>3</sub>.

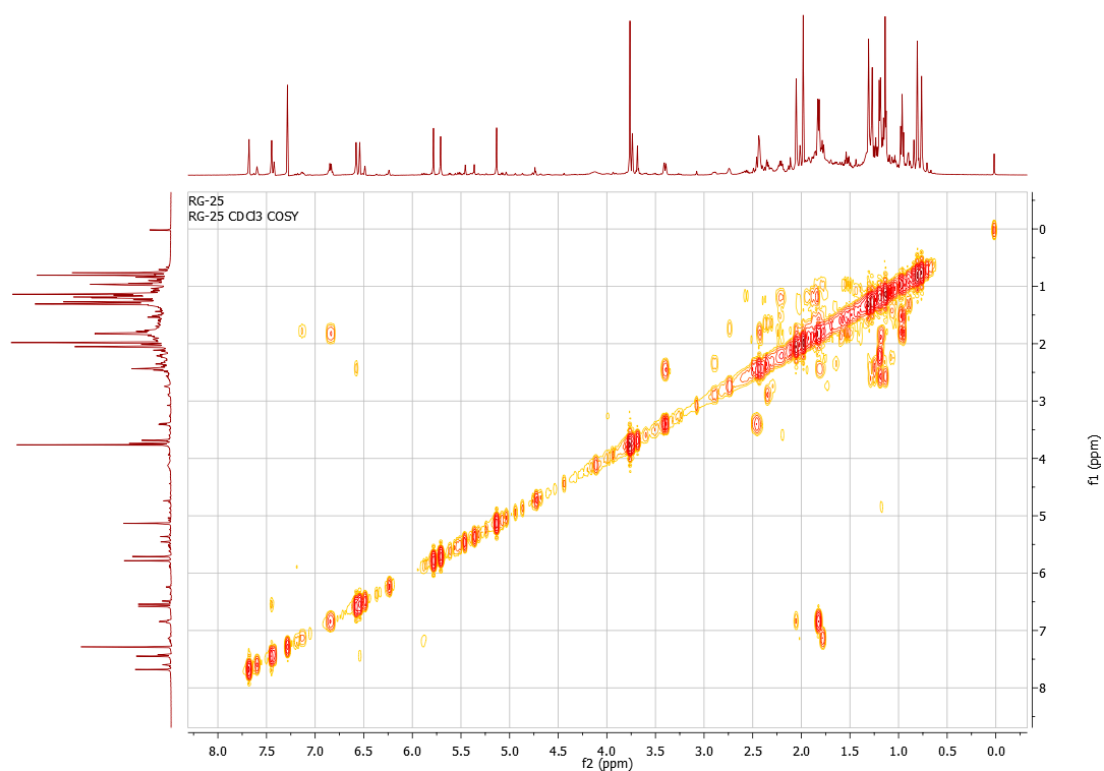

**Figure S4.** <sup>1</sup>H-<sup>1</sup>H COSY spectrum of compound **1** in CDCl<sub>3</sub>.

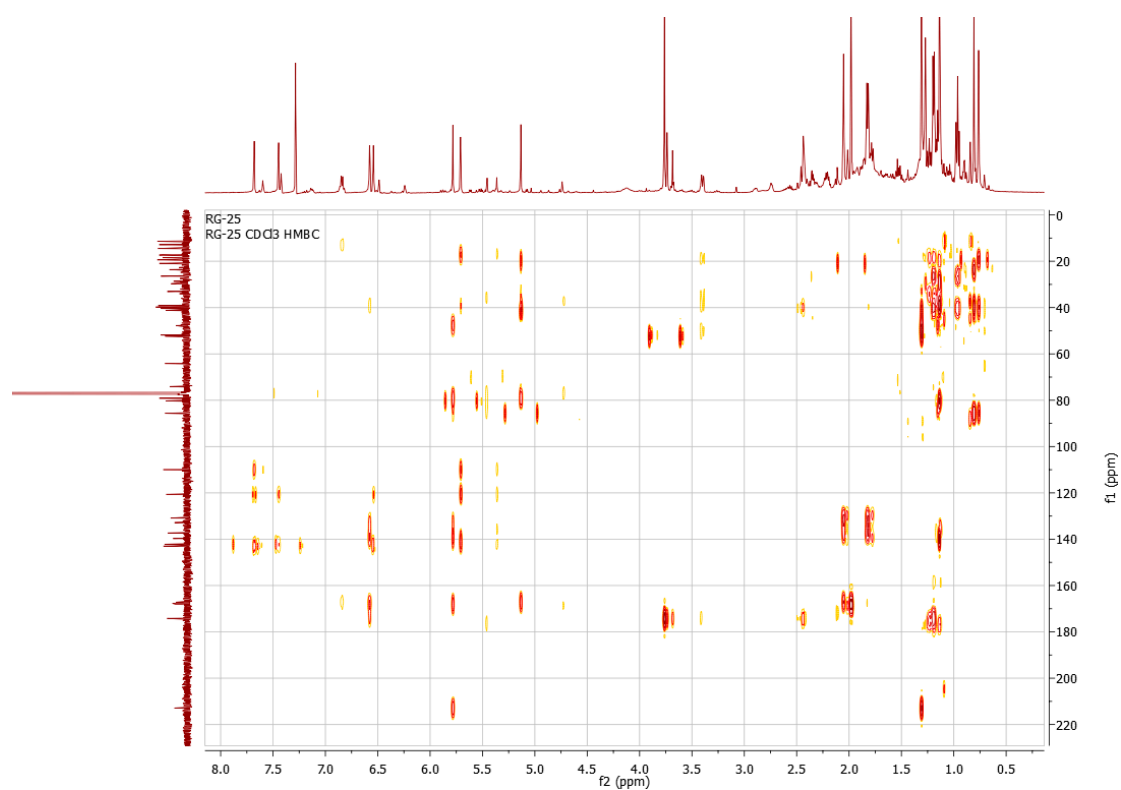

Figure S5. HMBC spectrum of compound **1** in CDCl<sub>3</sub>.

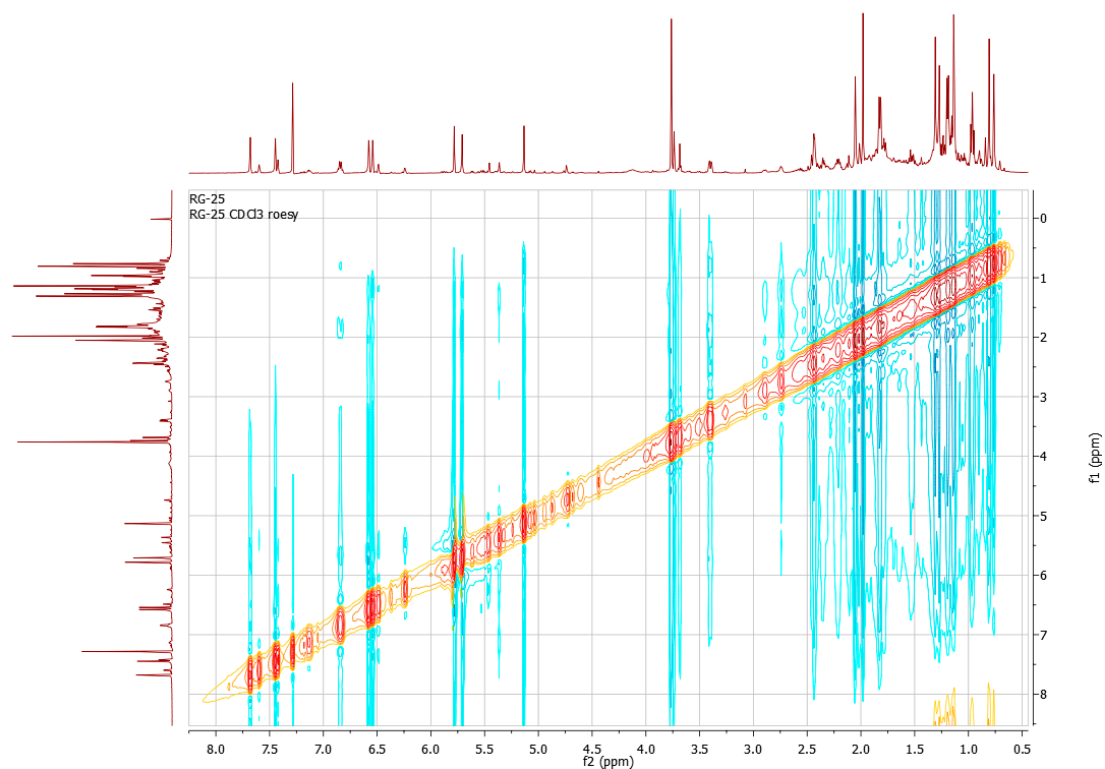

Figure S6. ROESY spectrum of compound **1** in CDCl<sub>3</sub>.

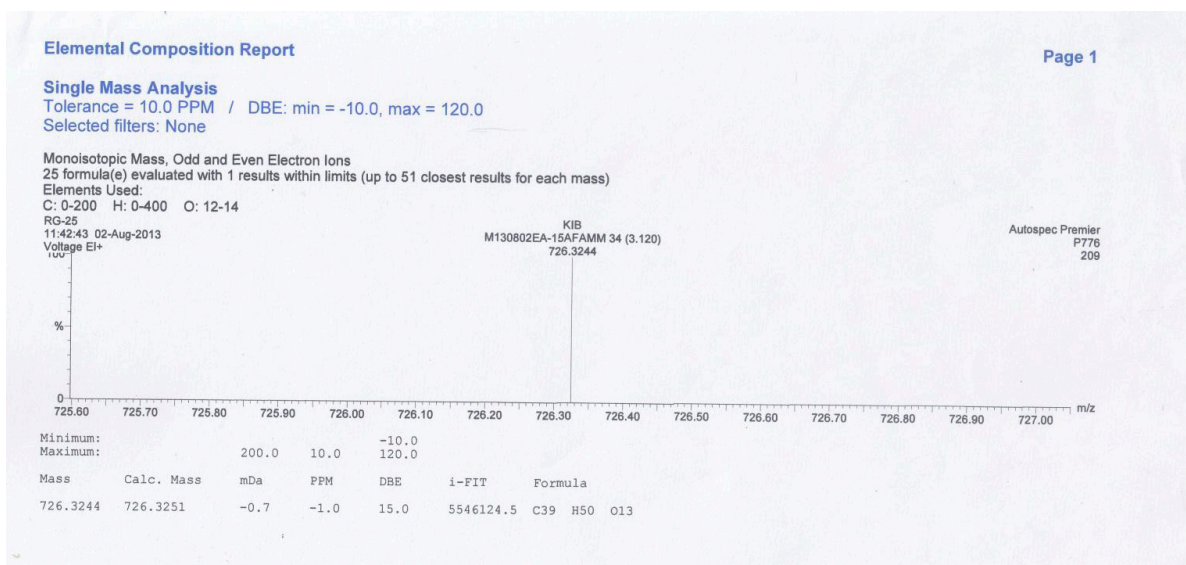

Figure S7. HREI-MS spectrum of compound 1.

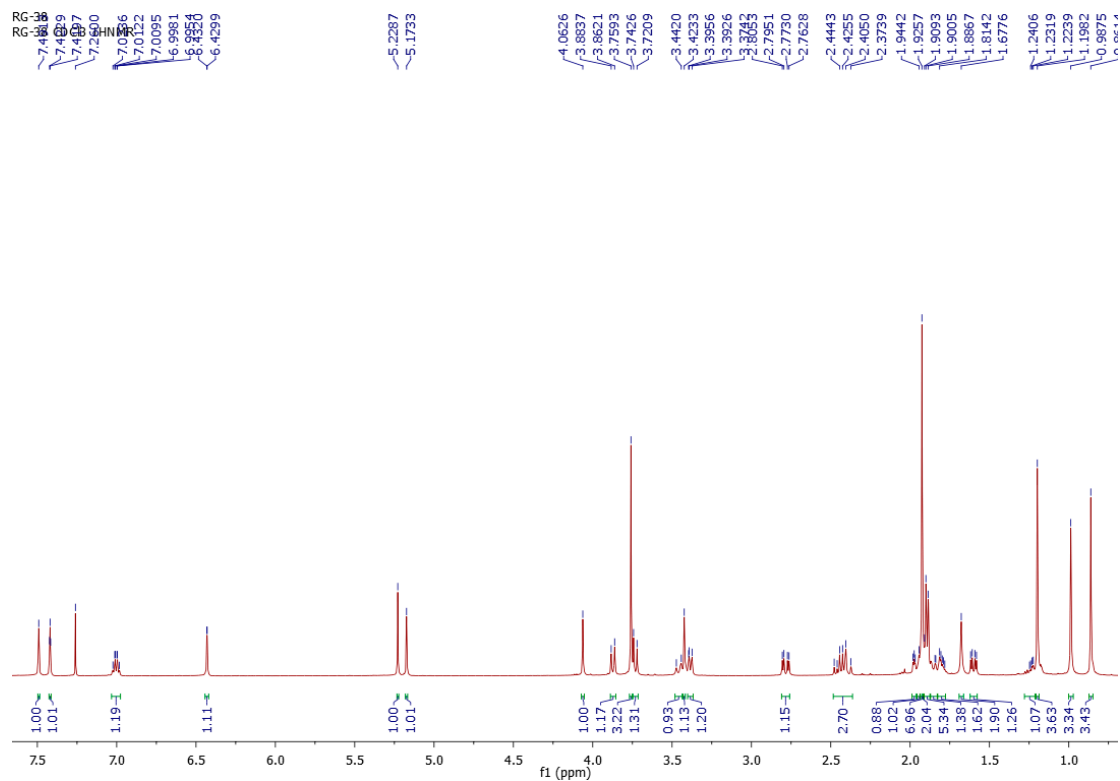Figure S8.  $^1\text{H}$ -NMR (500 MHz,  $\text{CDCl}_3$ ) spectrum of compound 2.

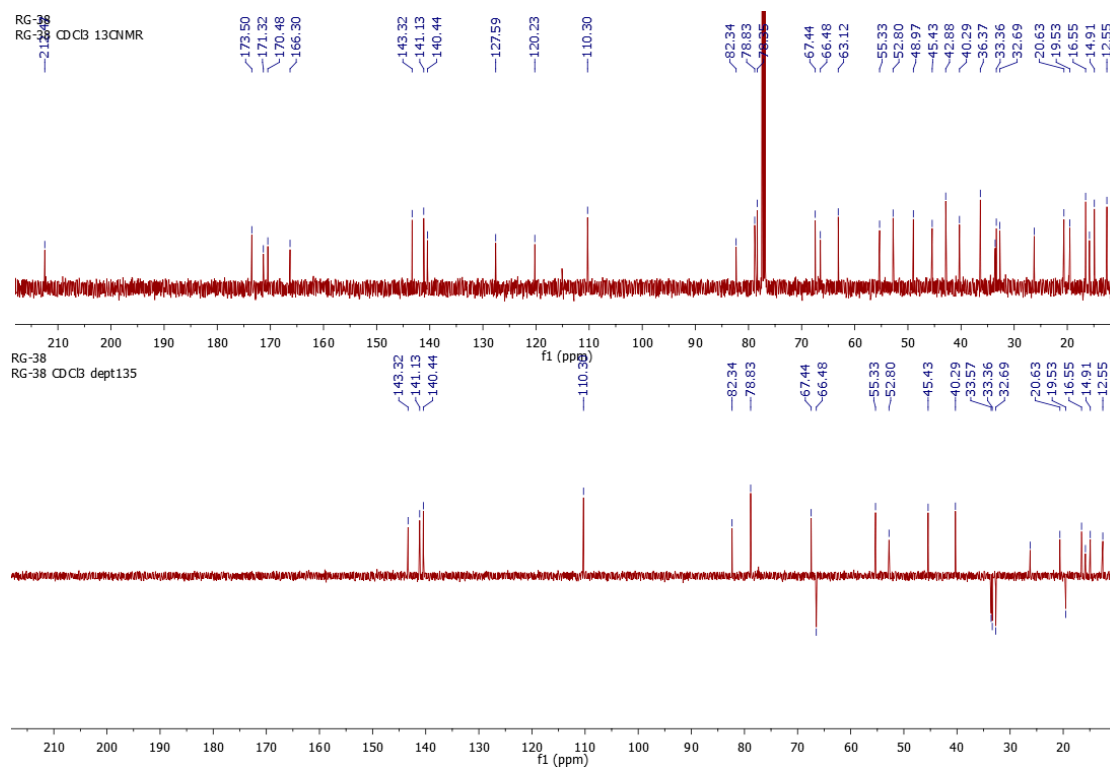

Figure S9.  $^{13}\text{C}$ -NMR (125 MHz,  $\text{CDCl}_3$ ) spectrum of compound 2.

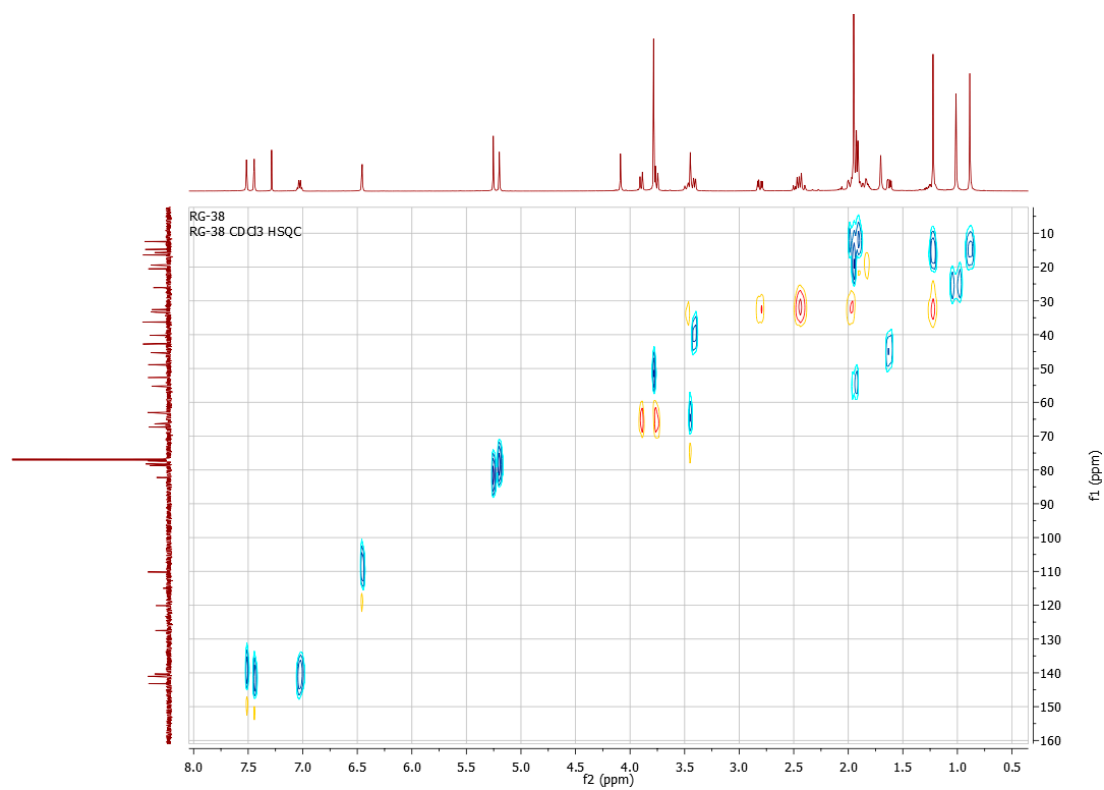

Figure S10. HSQC spectrum of compound 2 in  $\text{CDCl}_3$ .

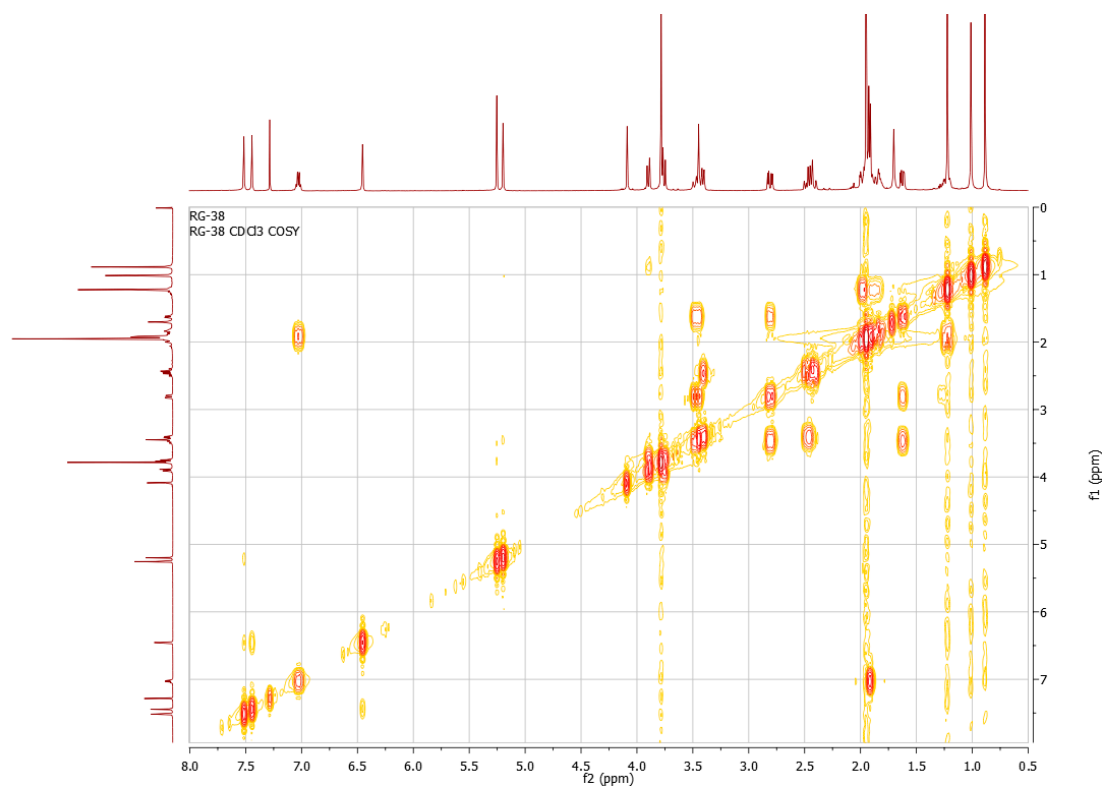

Figure S11.  $^1\text{H}$ - $^1\text{H}$  COSY spectrum of compound 2 in  $\text{CDCl}_3$ .

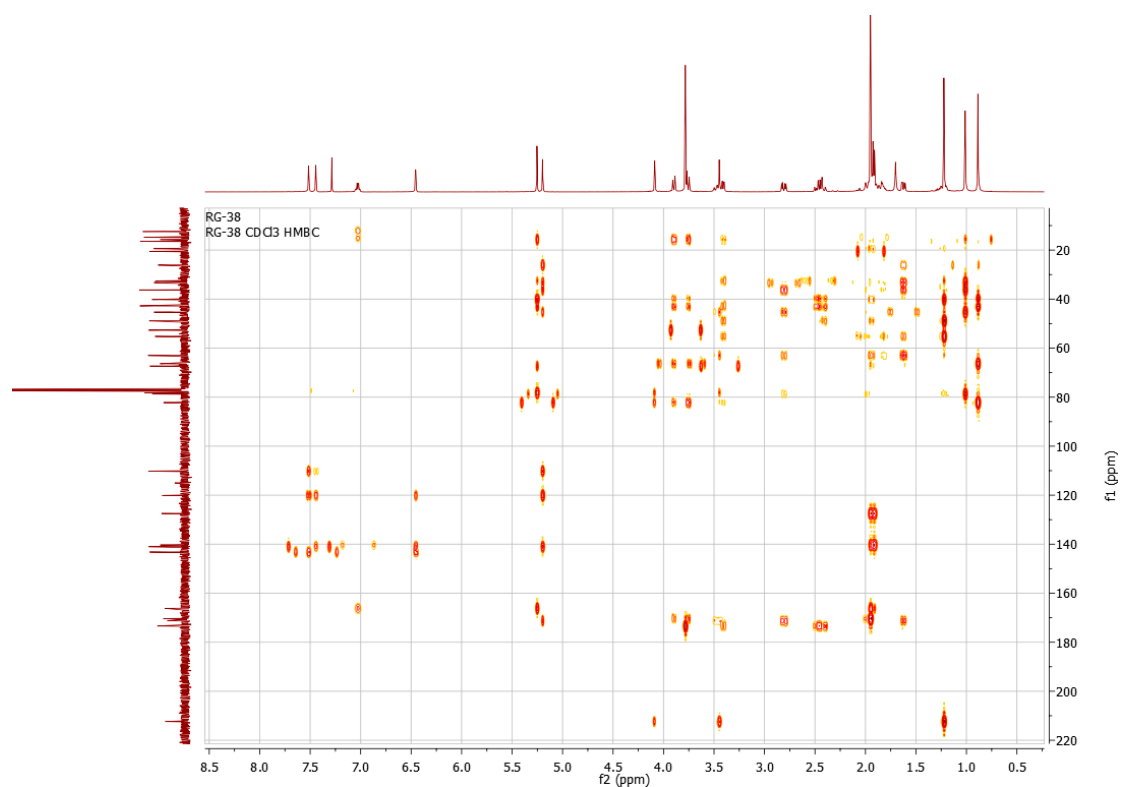

Figure S12. HMBC spectrum of compound 2 in  $\text{CDCl}_3$ .

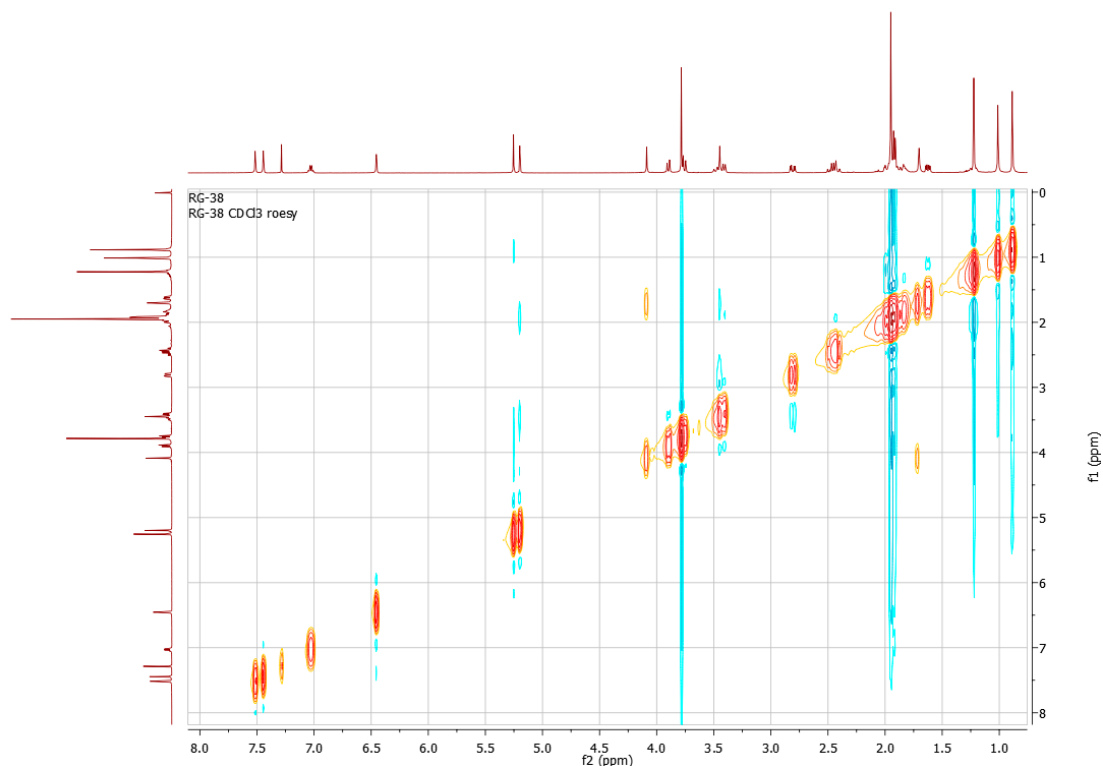Figure S13. ROESY spectrum of compound 2 in CDCl<sub>3</sub>.

### Qualitative Analysis Report

|                               |                             |                      |                      |
|-------------------------------|-----------------------------|----------------------|----------------------|
| <b>Data Filename</b>          | 140402ESIA5.d               | <b>Sample Name</b>   | RG-38                |
| <b>Sample Type</b>            | Sample                      | <b>Position</b>      |                      |
| <b>Instrument Name</b>        | Agilent G6230 TOF MS        | <b>User Name</b>     | KIB                  |
| <b>Acq Method</b>             | ESI.m                       | <b>Acquired Time</b> | 4/2/2014 11:36:35 AM |
| <b>IRM Calibration Status</b> | Success                     | <b>DA Method</b>     | ESIN.m               |
| <b>Comment</b>                |                             |                      |                      |
| <b>Sample Group</b>           | <b>Info.</b>                |                      |                      |
| <b>Acquisition SW</b>         | 6200 series TOF/6500 series |                      |                      |
| <b>Version</b>                | Q-TOF B.05.01 (B5125.1)     |                      |                      |

### User Spectra

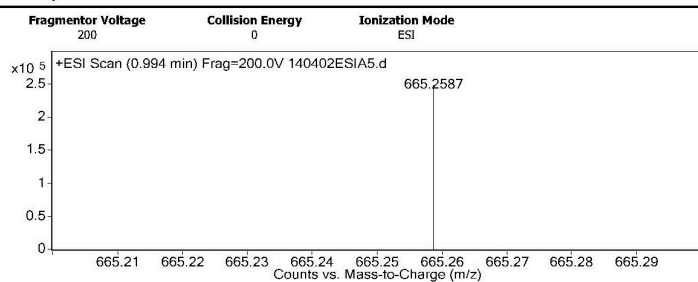

#### Peak List

| m/z       | z | Abund     |
|-----------|---|-----------|
| 1307.5271 | 1 | 360673.25 |

#### Formula Calculator Element Limits

| Element | Min | Max |
|---------|-----|-----|
| C       | 0   | 200 |
| H       | 0   | 400 |
| O       | 10  | 14  |
| Na      | 1   | 1   |

#### Formula Calculator Results

| Formula        | CalculatedMass | Mz       | Diff.(mDa) | Diff. (ppm) | DBE  |
|----------------|----------------|----------|------------|-------------|------|
| C34 H42 Na O12 | 665.2574       | 665.2587 | -1.3       | 2.0         | 13.5 |

--- End Of Report ---

Figure S14. HRESI-MS spectrum of compound 2.



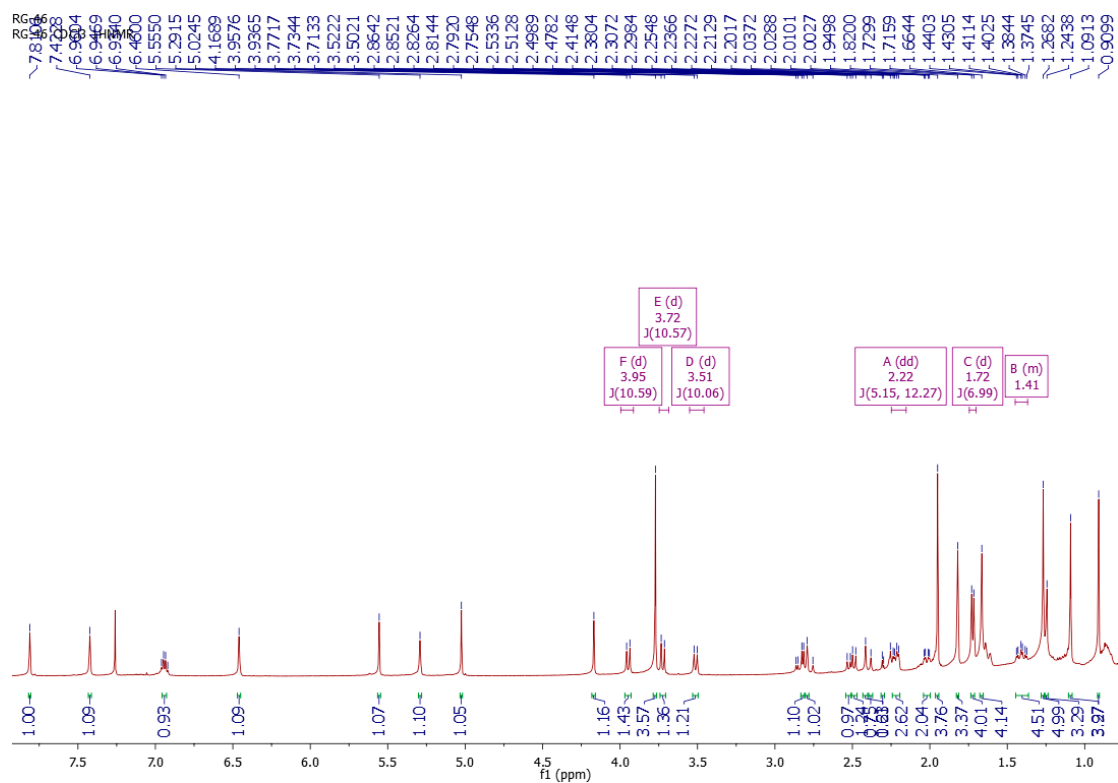

**Figure S15.**  $^1\text{H}$ -NMR (500 MHz,  $\text{CDCl}_3$ ) spectrum of compound **3**.

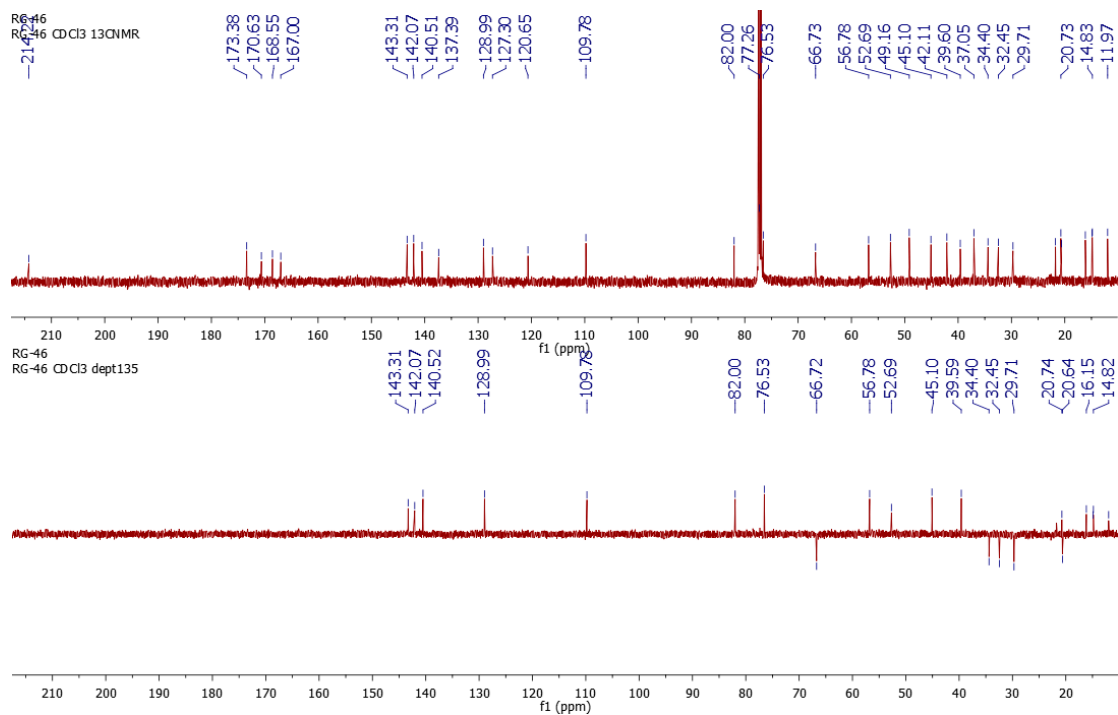

**Figure S16.**  $^{13}\text{C}$ -NMR (125 MHz,  $\text{CDCl}_3$ ) spectrum of compound **3**.

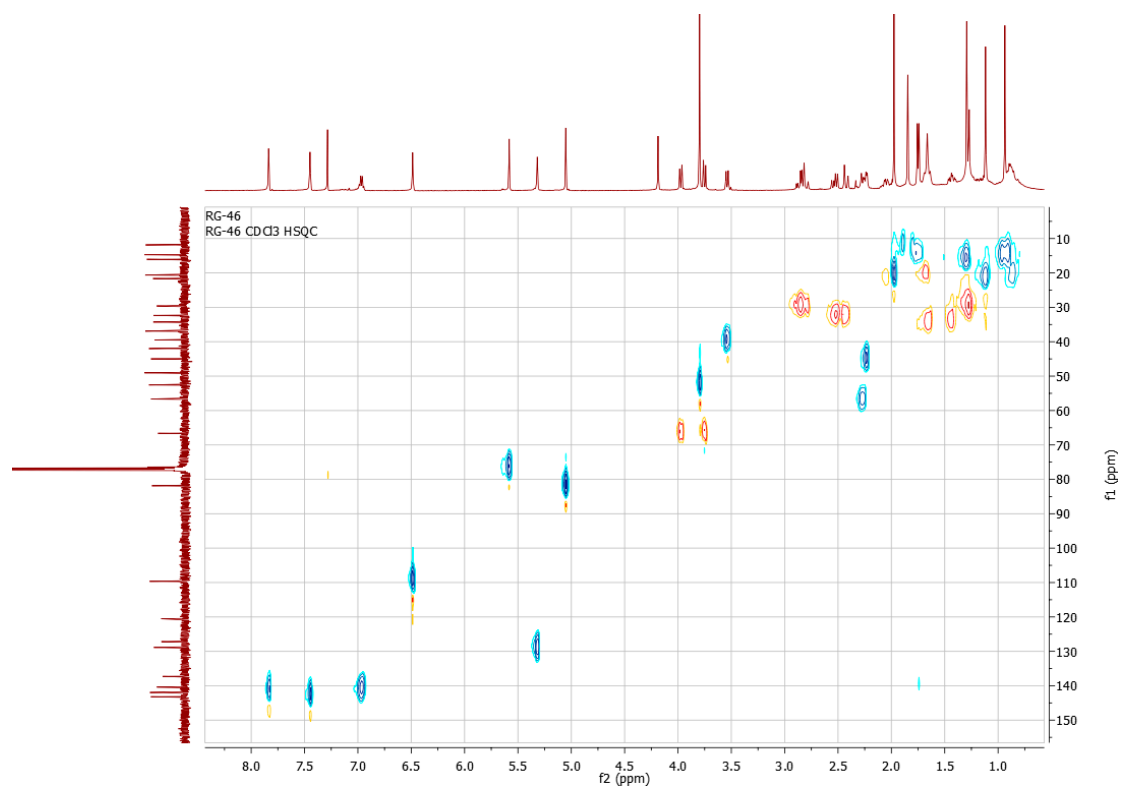

Figure S17. HSQC spectrum of compound 3 in CDCl<sub>3</sub>.

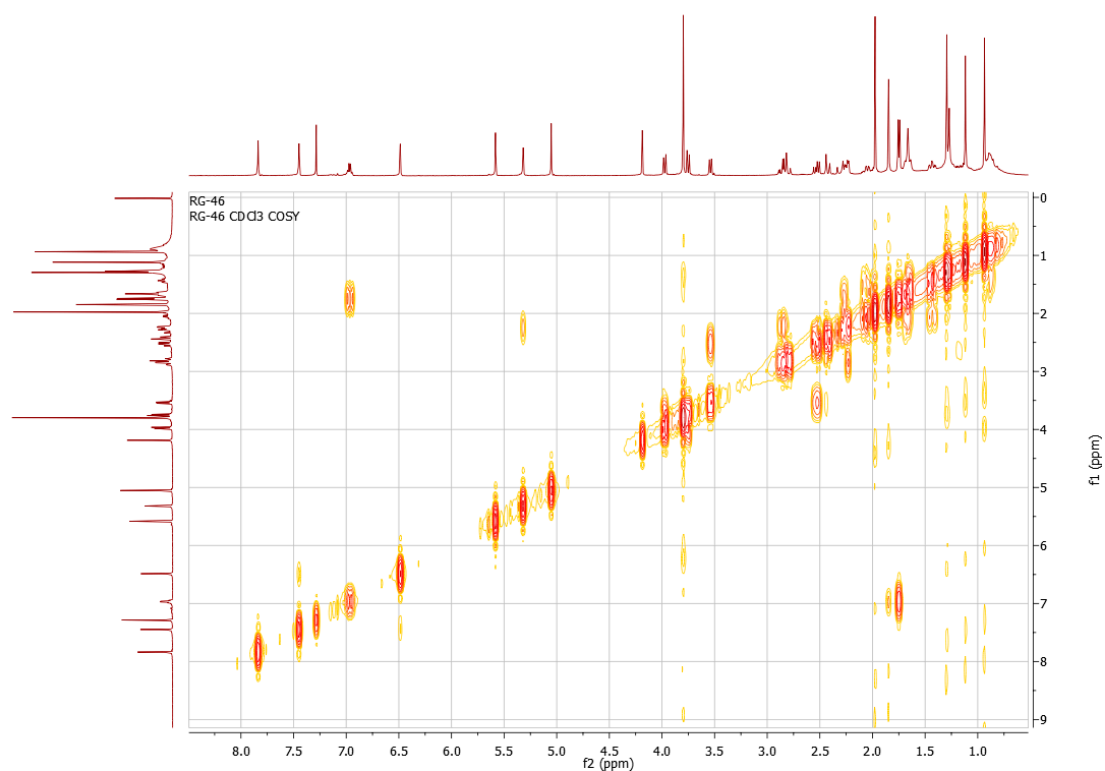

Figure S18. <sup>1</sup>H-<sup>1</sup>H COSY spectrum of compound 3 in CDCl<sub>3</sub>.

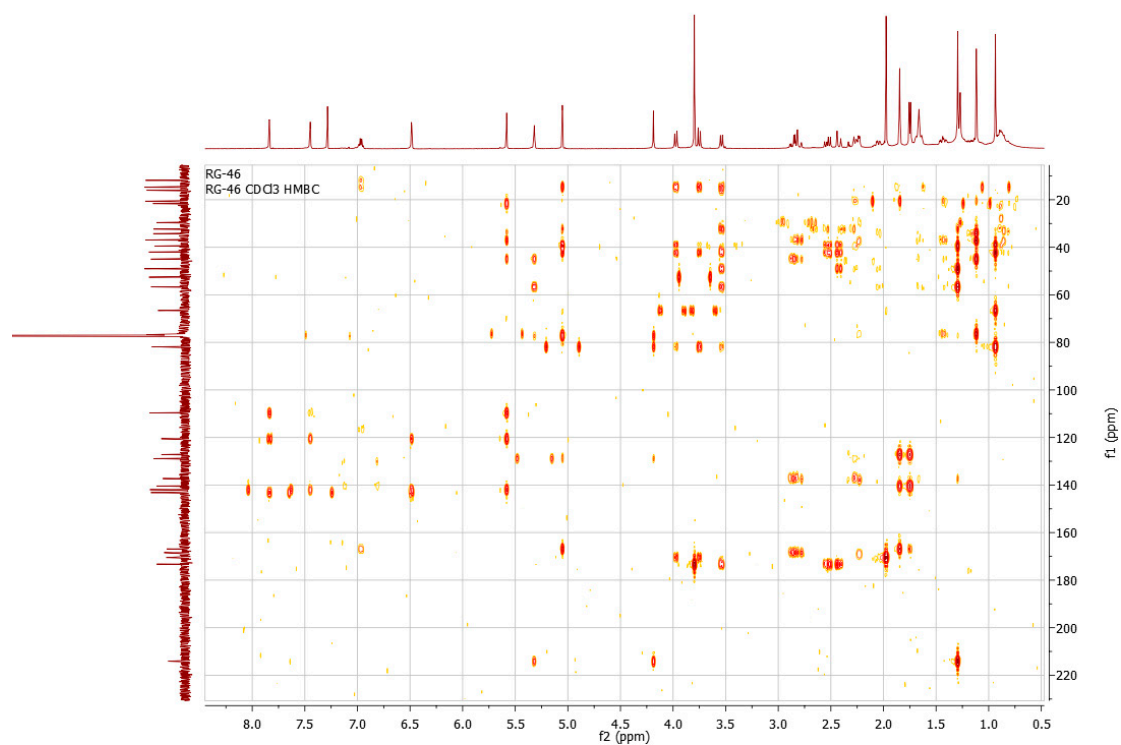

Figure S19. HMBC spectrum of compound 3 in CDCl<sub>3</sub>.

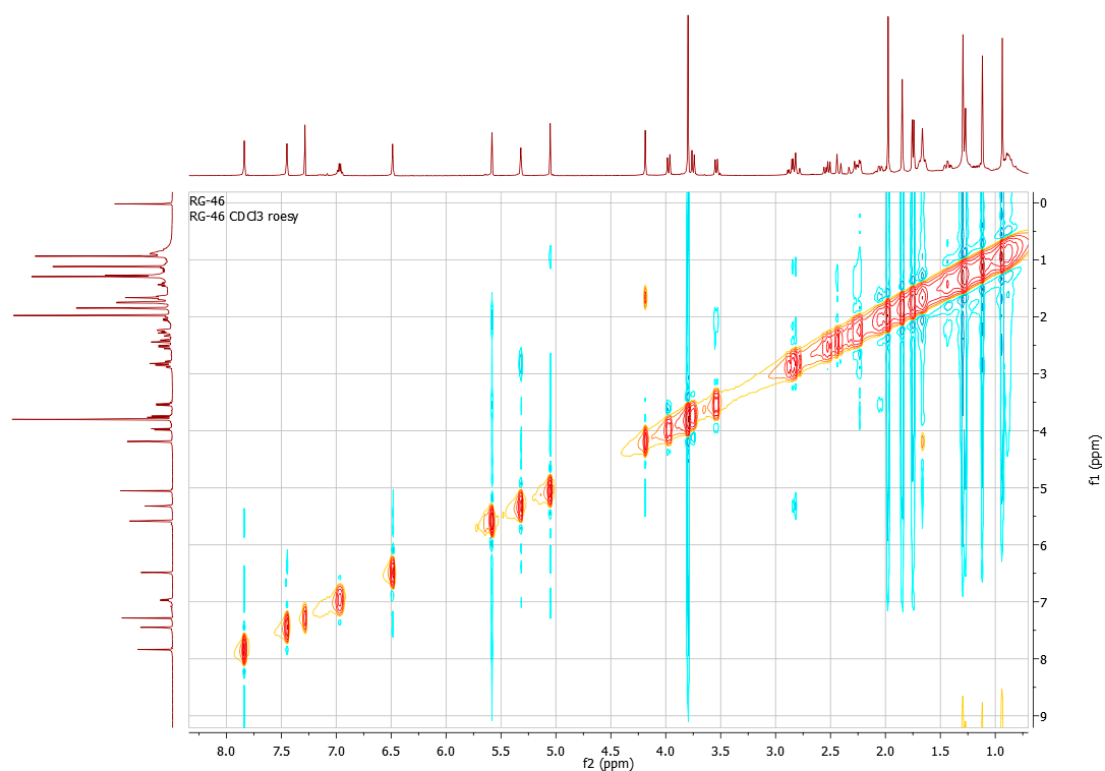

Figure S20. ROESY spectrum of compound 3 in CDCl<sub>3</sub>.

## Qualitative Analysis Report

|                               |                      |                      |                      |
|-------------------------------|----------------------|----------------------|----------------------|
| <b>Data Filename</b>          | 140401ESIA13.d       | <b>Sample Name</b>   | RG-46                |
| <b>Sample Type</b>            | Sample               | <b>Position</b>      |                      |
| <b>Instrument Name</b>        | Agilent G6230 TOF MS | <b>User Name</b>     | KJB                  |
| <b>Acq Method</b>             | ESI.m                | <b>Acquired Time</b> | 4/1/2014 10:45:24 AM |
| <b>IRM Calibration Status</b> | Success              | <b>DA Method</b>     | ESIN.m               |
| <b>Comment</b>                |                      |                      |                      |

|                       |                             |              |
|-----------------------|-----------------------------|--------------|
| <b>Sample Group</b>   |                             | <b>Info.</b> |
| <b>Acquisition SW</b> | 6200 series TOF/6500 series |              |
| <b>Version</b>        | Q-TOF B.05.01 (B5125.1)     |              |

## User Spectra

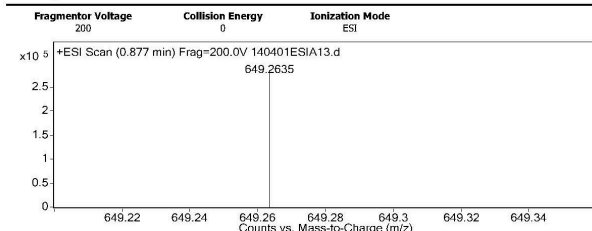

## Peak List

| m/z       | z | Abund     |
|-----------|---|-----------|
| 1275.5356 | 1 | 372917.97 |

## Formula Calculator Element Limits

| Element | Min | Max |
|---------|-----|-----|
| C       | 0   | 200 |
| H       | 0   | 400 |
| O       | 10  | 15  |
| Na      | 1   | 1   |

## Formula Calculator Results

| Formula        | CalculatedMass | Mz       | Diff.(mDa) | Diff.(ppm) | DBE  |
|----------------|----------------|----------|------------|------------|------|
| C34 H42 Na O11 | 649.2625       | 649.2635 | -1.0       | 1.5        | 13.5 |

--- End Of Report ---

Figure S21. HRESI-MS spectrum of compound 3.

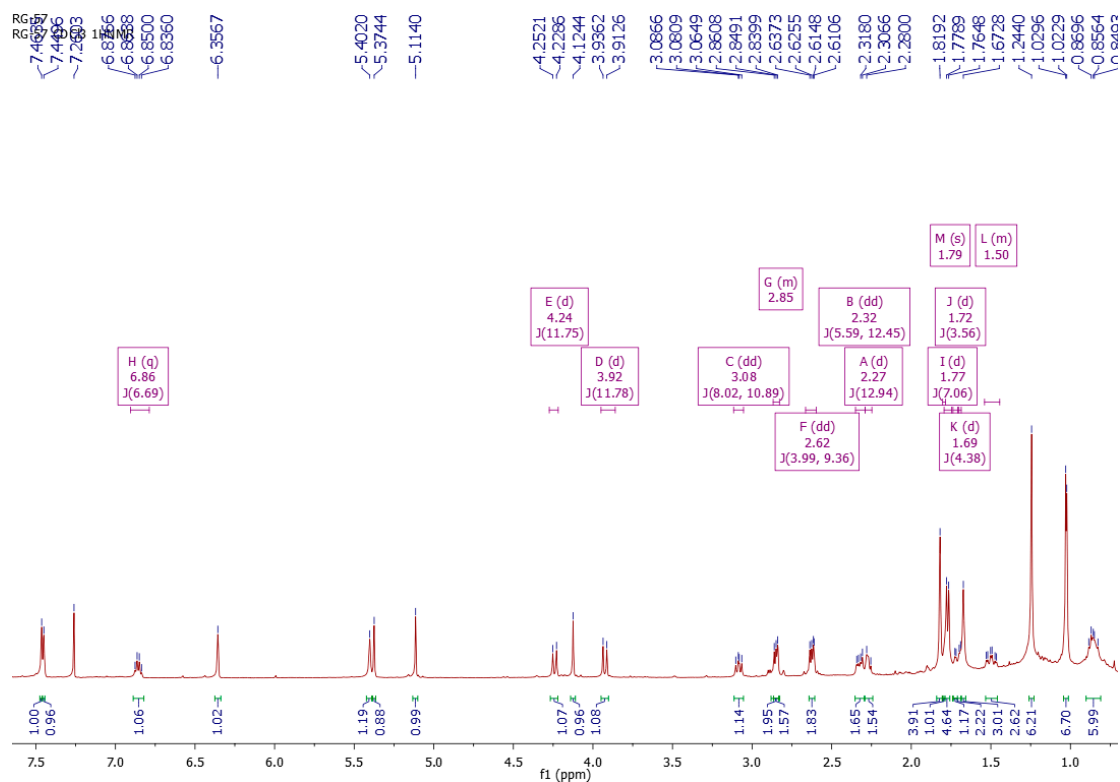Figure S22. <sup>1</sup>H-NMR (500 MHz, CDCl<sub>3</sub>) spectrum of compound 4.

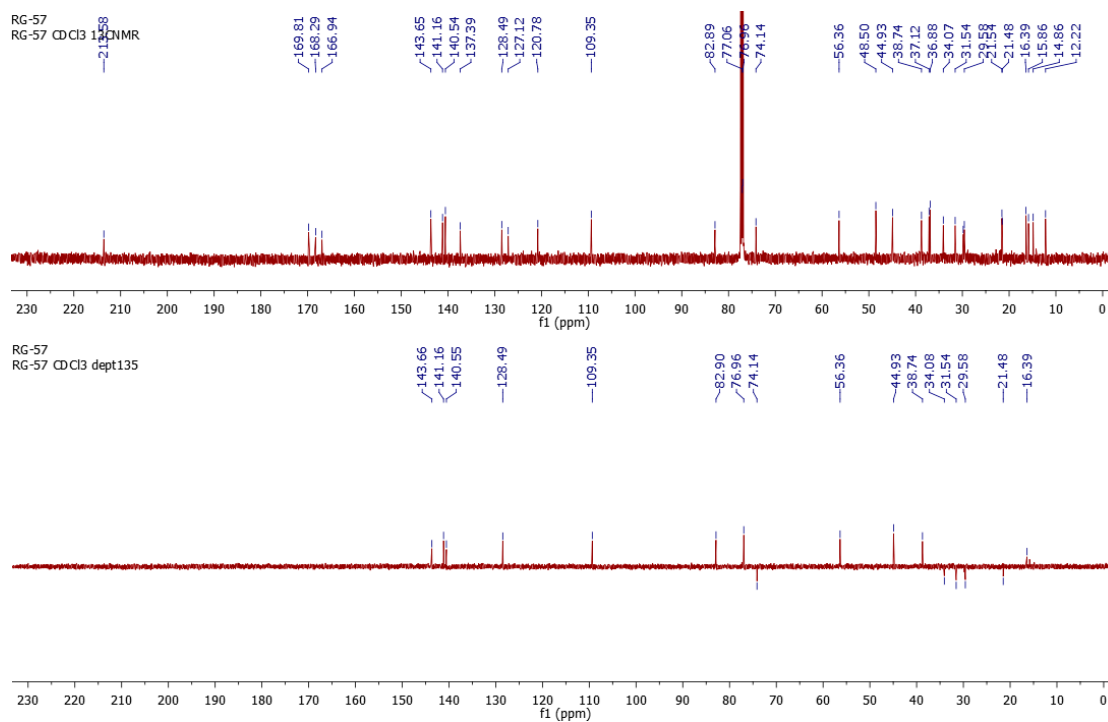

Figure S23. <sup>13</sup>C-NMR (125 MHz, CDCl<sub>3</sub>) spectrum of compound 4.

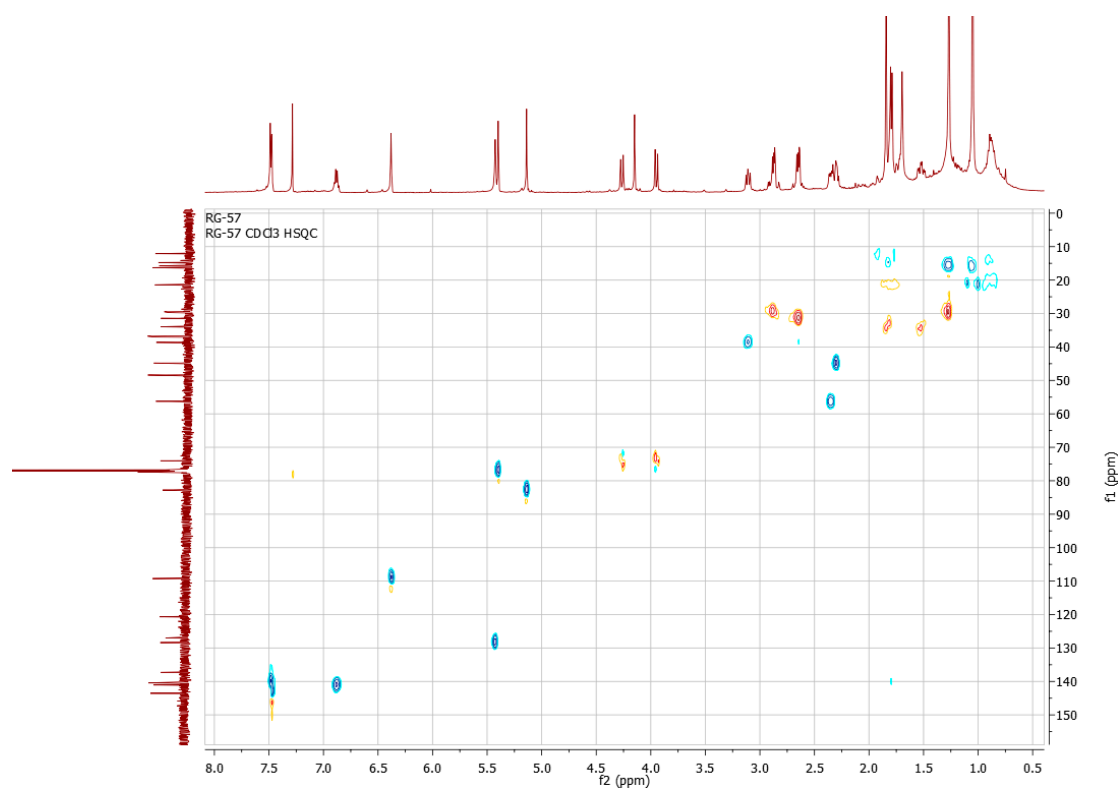

Figure S24. HSQC spectrum of compound 4 in CDCl<sub>3</sub>.

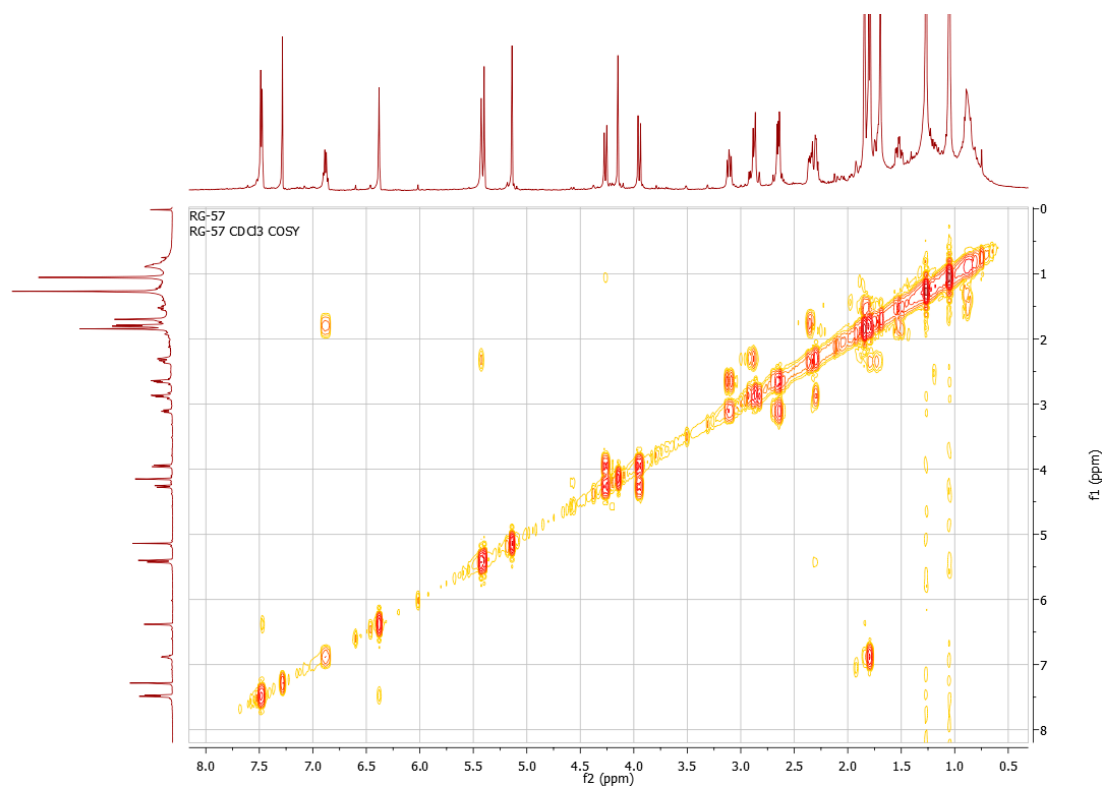

**Figure S25.**  $^1\text{H}$ - $^1\text{H}$  COSY spectrum of compound **4** in  $\text{CDCl}_3$ .

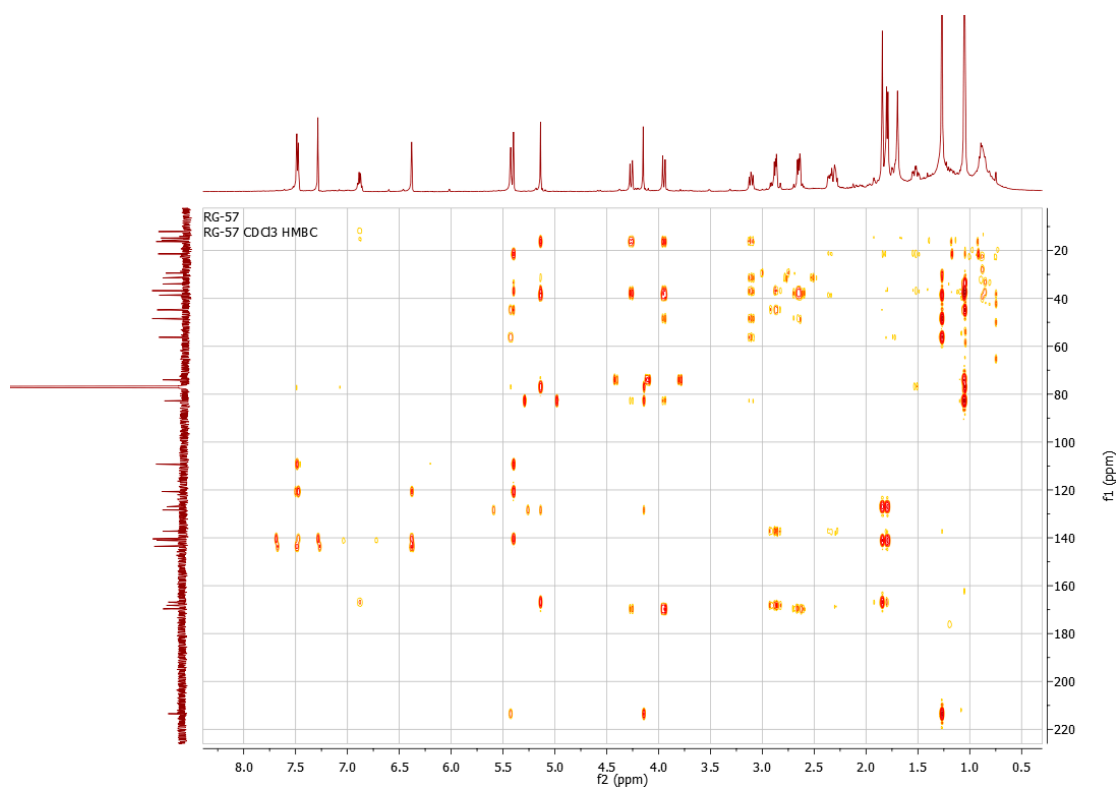

**Figure S26.** HMBC spectrum of compound **4** in  $\text{CDCl}_3$ .

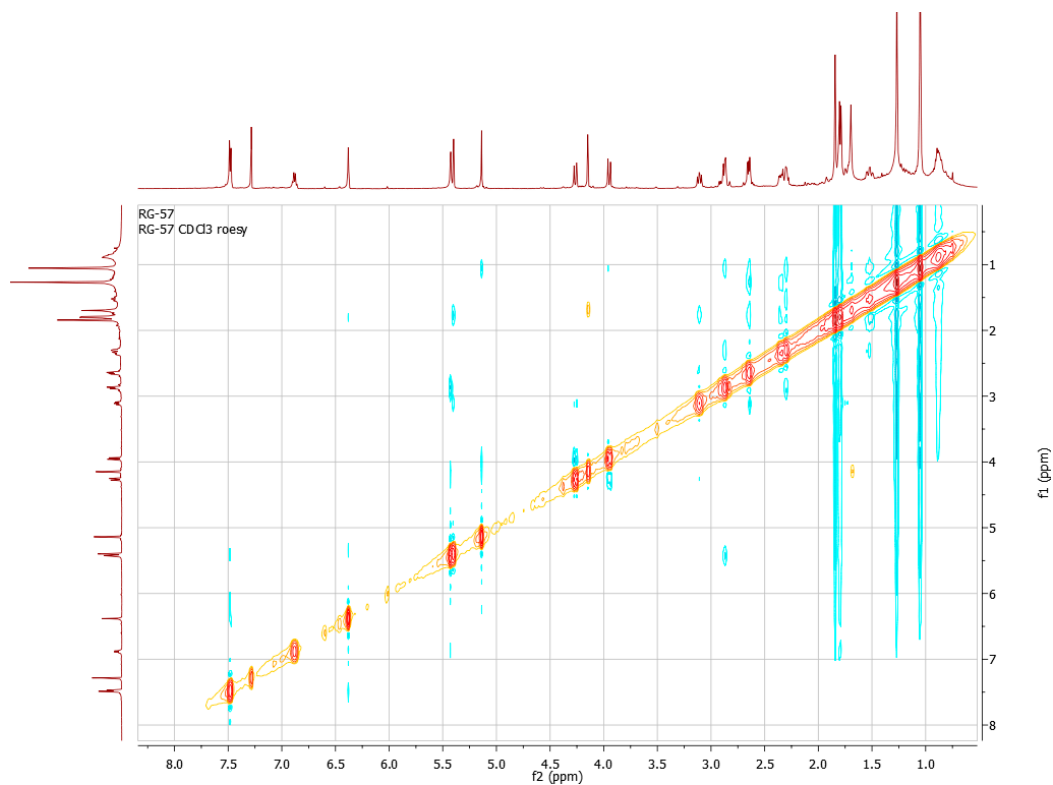Figure S27. ROESY spectrum of compound 4 in CDCl<sub>3</sub>.

### Qualitative Analysis Report

|                        |                             |               |                      |
|------------------------|-----------------------------|---------------|----------------------|
| Data Filename          | 140402ESI6.d                | Sample Name   | RG-57                |
| Sample Type            | Sample                      | Position      |                      |
| Instrument Name        | Agilent G6230 TOF MS        | User Name     | KIB                  |
| Acq Method             | ESI.m                       | Acquired Time | 4/2/2014 11:39:54 AM |
| IRM Calibration Status | Success                     | DA Method     | ESIN.m               |
| Comment                |                             |               |                      |
| Sample Group           | Info.                       |               |                      |
| Acquisition SW         | 6200 series TOF/6500 series |               |                      |
| Version                | Q-TOF B.05.01 (B5125.1)     |               |                      |

### User Spectra

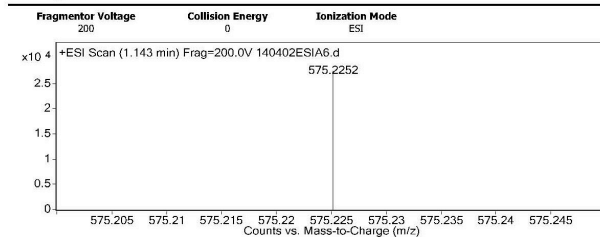

### Peak List

| m/z     | z | Abund  |
|---------|---|--------|
| 607.252 | 1 | 299401 |

| Element | Min | Max |
|---------|-----|-----|
| C       | 0   | 200 |
| H       | 0   | 400 |
| O       | 7   | 11  |
| Na      | 1   | 1   |

| Formula       | CalculatedMass | Mz       | Diff.(mDa) | Diff.(ppm) | DBE  |
|---------------|----------------|----------|------------|------------|------|
| C31 H36 Na O9 | 575.2257       | 575.2252 | 0.5        | 0.9        | 13.5 |

--- End Of Report ---

Figure S28. HRESI-MS spectrum of compound 4.
